# Supplementary material
Source: PubMed Central journal article supplement (PMC4308473)
Supplement: NIHMS644113-supplement-supplemental_material.pdf [file NIHMS644113-supplement-supplemental_material.pdf]

## **SUPPLEMENTAL MATERIAL**

Cooper, LL, Rong, J, Benjamin, EJ, et al. Components of Hemodynamic Load and Cardiovascular Events: The Framingham Heart Study.

### **Supplemental Content:**

**Supplemental Table 1. Comparison of baseline characteristics of included and excluded participants.**

**Supplemental Table 2. Matrix of Pearson correlation coefficients for measures of individual hemodynamic components ( $N=2492$ ).**

This supplementary material has been provided by the authors to give the readers additional information about their work.

**Supplemental Table 1. Comparison of baseline characteristics of included and excluded participants.**

| <b>Variable</b>                             | <b>Included<br/>(N = 2492)</b> | <b>Excluded<br/>(N varies)</b> |
|---------------------------------------------|--------------------------------|--------------------------------|
| <b>Clinical Measures</b>                    |                                |                                |
| Age, years                                  | 66 ± 9                         | 72 ± 9                         |
| Women, N (%)                                | 1402 (56)                      | 261 (49)                       |
| Height, cm                                  | 167 ± 10                       | 167 ± 9                        |
| Weight, kg                                  | 78 ± 17                        | 81 ± 19                        |
| Body mass index, kg/m <sup>2</sup>          | 28 ± 5                         | 30 ± 6                         |
| Physician blood pressure, mm Hg             |                                |                                |
| Systolic                                    | 128 ± 17                       | 131 ± 19                       |
| Diastolic                                   | 74 ± 10                        | 70 ± 10                        |
| Pulse                                       | 54 ± 16                        | 60 ± 18                        |
| Heart rate, beats/min                       | 62 ± 10                        | 63 ± 11                        |
| Total cholesterol, mg/dl                    | 189 ± 37                       | 169 ± 36                       |
| HDL cholesterol, mg/dl                      | 58 ± 18                        | 51 ± 16                        |
| Hypertension treatment, N (%)               | 1124 (45)                      | 322 (63)                       |
| Diabetes, N (%)                             | 288 (12)                       | 128 (30)                       |
| Current smoker, N (%)                       | 219 (9)                        | 54 (10)                        |
| <b>Hemodynamics measures</b>                |                                |                                |
| True forward pressure wave amplitude, mm Hg | 57 ± 17                        | 60 ± 19                        |
| Tonometry mean arterial pressure, mm Hg     | 98 ± 12                        | 100 ± 13                       |
| Global reflection coefficient               | 0.36 ± 0.07                    | 0.35 ± 0.07                    |

All values are mean ± standard deviation except as noted. Note that N varies (45 – 529) for excluded participants based on availability of data.

**Supplemental Table 2. Matrix of Pearson correlation coefficients for measures of individual hemodynamic components (N=2492).**

|                               | Central SBP    | SBP            | MAP            | DBP            | Brachial PP     | Forward wave    | Backward wave  | Reflection coefficient | Primary wave    | Z <sub>c</sub>  | Peak flow       | CFPWV           |
|-------------------------------|----------------|----------------|----------------|----------------|-----------------|-----------------|----------------|------------------------|-----------------|-----------------|-----------------|-----------------|
| <b>Physician SBP</b>          | 0.73<br><0.001 | 0.77<br><0.001 | 0.65<br><0.001 | 0.29<br><0.001 | 0.67<br><0.001  | 0.62<br><0.001  | 0.61<br><0.001 | 0.04<br>0.04           | 0.56<br><0.001  | 0.45<br><0.001  | -0.01<br>0.59   | 0.50<br><0.001  |
| <b>Central SBP</b>            |                | 0.94<br><0.001 | 0.85<br><0.001 | 0.35<br><0.001 | 0.83<br><0.001  | 0.84<br><0.001  | 0.85<br><0.001 | 0.08<br><0.001         | 0.76<br><0.001  | 0.64<br><0.001  | -0.07<br><0.001 | 0.52<br><0.001  |
| <b>SBP</b>                    |                |                | 0.85<br><0.001 | 0.36<br><0.001 | 0.89<br><0.001  | 0.81<br><0.001  | 0.80<br><0.001 | 0.05<br>0.007          | 0.74<br><0.001  | 0.60<br><0.001  | -0.04<br>0.05   | 0.58<br><0.001  |
| <b>MAP</b>                    |                |                |                | 0.76<br><0.001 | 0.53<br><0.001  | 0.52<br><0.001  | 0.58<br><0.001 | 0.12<br><0.001         | 0.47<br><0.001  | 0.40<br><0.001  | -0.06<br>0.002  | 0.45<br><0.001  |
| <b>DBP</b>                    |                |                |                |                | -0.11<br><0.001 | -0.10<br><0.001 | -0.003<br>0.89 | 0.14<br><0.001         | -0.11<br><0.001 | -0.10<br><0.001 | 0.01<br>0.49    | 0.16<br><0.001  |
| <b>Brachial PP</b>            |                |                |                |                |                 | 0.91<br><0.001  | 0.86<br><0.001 | -0.01<br>0.50          | 0.84<br><0.001  | 0.68<br><0.001  | -0.05<br>0.016  | 0.54<br><0.001  |
| <b>Forward wave</b>           |                |                |                |                |                 |                 | 0.78<br><0.001 | -0.24<br><0.001        | 0.97<br><0.001  | 0.79<br><0.001  | -0.05<br>0.009  | 0.52<br><0.001  |
| <b>Backward wave</b>          |                |                |                |                |                 |                 |                | 0.39<br><0.001         | 0.66<br><0.001  | 0.55<br><0.001  | -0.06<br>0.003  | 0.38<br><0.001  |
| <b>Reflection coefficient</b> |                |                |                |                |                 |                 |                |                        | -0.39<br><0.001 | -0.30<br><0.001 | -0.002<br>0.94  | -0.18<br><0.001 |
| <b>Primary wave</b>           |                |                |                |                |                 |                 |                |                        |                 | 0.79<br><0.001  | -0.02<br>0.45   | 0.51<br><0.001  |
| <b>Z<sub>c</sub></b>          |                |                |                |                |                 |                 |                |                        |                 |                 | -0.62<br><0.001 | 0.45<br><0.001  |
| <b>Peak flow</b>              |                |                |                |                |                 |                 |                |                        |                 |                 |                 | -0.09<br><0.001 |

Top value is *r*, and bottom value is *P* in each cell. SBP, systolic blood pressure; DBP, diastolic blood pressure; PP, pulse pressure; Z<sub>c</sub>, aortic characteristic impedance; CFPWV, carotid femoral pulse wave velocity. All values were obtained at the time of tonometry except physician
